# Supplementary material for: Adaptation after Extreme Flooding Events: Moving or Staying? The Case of the Ahr Valley in Germany
Source: MDPI journal article supplement (doi:10.3390/su15021407), 2023-01-11
Supplement: s1 [file s1]

Archive with 1 entries (1 files):
- sustainability-2149297-supplementary.pdf
