# Supplementary material for: Adaptation after Extreme Flooding Events: Moving or Staying? The Case of the Ahr Valley in Germany
Source: MDPI journal article supplement (doi:10.3390/su15021407), 2023-01-11
Supplement: s1 [file s1 › sustainability-2149297-supplementary.pdf]

## Supplementary Materials File S1: Household survey in the district of Ahrweiler on the flood event of July 2021 – Excerpt of the questionnaire

### General introduction

In **July 2021**, were you living for rent or in your own property/property of close relatives?

- ☐ Rent
- ☐ Property/property of close relatives
- ☐ No answer

Where was/is your **July 2021** residential building located?

- ☐ Inside the special hazard “yellow” zone
- ☐ Inside the legally defined floodplain of July 2021
- ☐ Outside the legally defined floodplain of July 2021 but inside the new floodplain provisionally defined by law
- ☐ Outside new floodplain provisionally defined by law but inside the flooded area from July 2021
- ☐ Outside new floodplain provisionally defined by law and outside flooded area from July 2021
- ☐ No answer

How long have you lived/do you live at this location (**prior** to the July 2021 flood)?

**Note:** Please enter the year. If you do not know exactly, you can round to the decade.

In my apartment/house since \_ \_ \_ \_

Where do you **currently** live?

- ☐ In the same house/apartment as in July 2021 → Filter (next question was skipped)
- ☐ In temporary housing/ with friends/ relatives → Filter (next question was skipped)
- ☐ Permanently in another house/apartment in the same district
- ☐ Permanently in another district
- ☐ Permanently in another city
- ☐ No answer

Where is your **current** residential building located?

- ☐ Inside the special hazard “yellow” zone
- ☐ Inside the legally defined floodplain of July 2021
- ☐ Outside the legally defined floodplain of July 2021 but inside the new floodplain provisionally defined by law
- ☐ Outside new floodplain provisionally defined by law but inside the flooded area from July 2021
- ☐ Outside new floodplain provisionally defined by law and outside flooded area from July 2021
- ☐ No answer

## Experience with the July 2021 flood event

Did you have to leave your home due to a public call, an official order, or because of the damage?

☐ Yes

☐ No

→ Filter (next question was skipped)

☐ No answer

After how many days or months were you able to return to your home permanently?

☐ After 1-2 days

☐ After about four months (end of November 2021)

☐ After about a week

☐ After about six months (end of January 2022)

☐ After about two weeks

☐ After about eight months (end of March 2022)

☐ After about four weeks (end of August 2021)

☐ Not until today

☐ After about two months (end of September 2021)

☐ No answer

Before the July 2021 flood event, did you know you lived in a flood-prone area?

☐ Yes

☐ No

☐ No answer

## Restoration after the July 2021 flood event

What was the total financial damage to your inventory/personal belongings and building/property caused by the 2021 flood?

☐ Under 500€

☐ 50,000€-74,999€

☐ 500-999€

☐ 75,000€-99,999€

☐ 1,000-4,999€

☐ 100,000€ or more

☐ 5,000-9,999€

☐ No financial damage

☐ 10,000-24,999€

☐ No answer

☐ 25,000-49,999€

Is it possible to refurbish your building?

☐ Yes

☐ No

☐ No answer

Please compare your building/property and personal belongings before the flood and their current condition. Have the damaged building and personal belongings, such as appliances or furnishings, been repaired/replaced in the meantime, or do the building/property and personal belongings still have significant deficiencies and defects as a result of the flood impact?

| 1 = completely replaced  | 2                        | 3                        | 4                        | 5                        | 6 = significant deficiencies | No answer                |
|--------------------------|--------------------------|--------------------------|--------------------------|--------------------------|------------------------------|--------------------------|
| <input type="checkbox"/>     | <input type="checkbox"/> |

## Prevention & Risk Perception

Do you plan to move?

☐ Yes

☐ No

☐ No answer

What are the reasons for your relocation?

**Note:** Please check off everything that applies to you.

☐ The location is too dangerous for me.

☐ Reconstruction/refurbishment is too expensive and/or too complex for me.

☐ My place of residence no longer offers a quality of life.

☐ I was living in a rented flat/house.

☐ No answer

How important are the following factors to you when deciding on a new location?

|                                                                                        | 1 = completely unimportant | 2                        | 3                        | 4                        | 5                        | 6 = very important       | No answer                |
|----------------------------------------------------------------------------------------|----------------------------|--------------------------|--------------------------|--------------------------|--------------------------|--------------------------|--------------------------|
| Short distance to former place of residence (e.g. because of neighbors, place of work) | <input type="checkbox"/>   | <input type="checkbox"/> | <input type="checkbox"/> | <input type="checkbox"/> | <input type="checkbox"/> | <input type="checkbox"/> | <input type="checkbox"/> |
| Possibility of remaining in the same (associated) municipality                         | <input type="checkbox"/>   | <input type="checkbox"/> | <input type="checkbox"/> | <input type="checkbox"/> | <input type="checkbox"/> | <input type="checkbox"/> | <input type="checkbox"/> |
| Good connection to public transport                                                    | <input type="checkbox"/>   | <input type="checkbox"/> | <input type="checkbox"/> | <input type="checkbox"/> | <input type="checkbox"/> | <input type="checkbox"/> | <input type="checkbox"/> |
| Good connection to local supply                                                        | <input type="checkbox"/>   | <input type="checkbox"/> | <input type="checkbox"/> | <input type="checkbox"/> | <input type="checkbox"/> | <input type="checkbox"/> | <input type="checkbox"/> |
| Good social environment                                                                | <input type="checkbox"/>   | <input type="checkbox"/> | <input type="checkbox"/> | <input type="checkbox"/> | <input type="checkbox"/> | <input type="checkbox"/> | <input type="checkbox"/> |

|                                                          |                          |                          |                          |                          |                          |                          |                          |
|----------------------------------------------------------|--------------------------|--------------------------|--------------------------|--------------------------|--------------------------|--------------------------|--------------------------|
| Joint move with other affected neighbors                 | <input type="checkbox"/> |
| Flood-adapted construction of the new building           | <input type="checkbox"/> |
| Flood-proof location of the new building                 | <input type="checkbox"/> |
| Sustainability and energy efficiency of the new building | <input type="checkbox"/> |
| Financial support from the state                         | <input type="checkbox"/> |

What are key factors that influenced your decision to stay in the same location?

**Note:** Please check off everything that applies to you.

- ☐ I don't think a move is necessary because my residential building was not affected by the 2021 flood.
- ☐ I don't think a move is necessary because an extreme flood (like the July 2021 flood) is very rare.
- ☐ I don't think a move is necessary because my building can be protected from floods.
- ☐ I don't have the strength/energy to move.
- ☐ I don't have the finances to move/I cannot adequately use the reconstruction funds to move to another area.
- ☐ I can't sell my building because the market value has dropped too much.
- ☐ I can't find any suitable replacement areas nearby.
- ☐ I feel strongly rooted in the place I live.
- ☐ I wasn't able to deal with the issue of "settlement retreat/relocation" during reconstruction.
- ☐ No answer

How likely do you think it is that your current apartment/house will be affected by flooding again?

|                          |                          |                          |                          |                          |                          |                          |
|--------------------------|--------------------------|--------------------------|--------------------------|--------------------------|--------------------------|--------------------------|
| 1 = very unlikely        | 2                        | 3                        | 4                        | 5                        | 6 = very likely          | No answer                |
| <input type="checkbox"/> |

How do you assess the impact of a possible future flood on yourself personally?

|                          |                          |                          |                          |                          |                          |                          |
|--------------------------|--------------------------|--------------------------|--------------------------|--------------------------|--------------------------|--------------------------|
| 1 = not bad              | 2                        | 3                        | 4                        | 5                        | 6 = very bad             | No answer                |
| <input type="checkbox"/> |

## Reconstruction process

One possible measure in the context of reconstruction is a partial settlement retreat, i.e. the residential and working locations are partially not rebuilt at the same, flood-prone location or are deconstructed.

To what extent do you agree with the following statements?

|                                                                                                                                                | 1 = disagree<br>at all   | 2                        | 3                        | 4                        | 5                        | 6 = agree<br>completely  | No<br>answer             |
|------------------------------------------------------------------------------------------------------------------------------------------------|--------------------------|--------------------------|--------------------------|--------------------------|--------------------------|--------------------------|--------------------------|
| I consider a settlement retreat to be a meaningful measure in terms of risk prevention and climate change adaptation                           | <input type="checkbox"/> |
| Particularly sensitive or critical infrastructures (e.g. hospitals, schools) should be relocated from the immediate vicinity of the Ahr River. | <input type="checkbox"/> |
| I feel well informed regarding the settlement retreat and floodplain designation                                                               | <input type="checkbox"/> |

## Information about your person and household

How true is the following statement for you personally?

|                                                                                                                          | 1 = not<br>true at all   | 2                        | 3                        | 4                        | 5                        | 6 =<br>absolutely<br>true | No<br>answer             |
|--------------------------------------------------------------------------------------------------------------------------|--------------------------|--------------------------|--------------------------|--------------------------|--------------------------|---------------------------|--------------------------|
| I am someone to whom it is important to live in a safe environment and who avoids anything that threatens my own safety. | <input type="checkbox"/>  | <input type="checkbox"/> |

To which gender do you assign yourself?

|                                 |                                    |
|---------------------------------|------------------------------------|
| <input type="checkbox"/> Female | <input type="checkbox"/> Divers    |
| <input type="checkbox"/> Male   | <input type="checkbox"/> No answer |

| How old are you?                     |                                            |
|--------------------------------------|--------------------------------------------|
| <input type="checkbox"/> 18-19 years | <input type="checkbox"/> 65-69 years       |
| <input type="checkbox"/> 20-29 years | <input type="checkbox"/> 70-74 years       |
| <input type="checkbox"/> 30-39 years | <input type="checkbox"/> 75-79 years       |
| <input type="checkbox"/> 40-49 years | <input type="checkbox"/> 80 years or older |
| <input type="checkbox"/> 50-59 years | <input type="checkbox"/> No answer         |
| <input type="checkbox"/> 60-64 years |                                            |

| What is your household's total monthly income after taxes and social contributions (net income)?                                                                                                       |                                         |
|--------------------------------------------------------------------------------------------------------------------------------------------------------------------------------------------------------|-----------------------------------------|
| <b>Notes:</b><br><i>- Please include all income you have (e.g. also income from rent, housing subsidy, pension).</i><br><i>- If you live in a shared apartment, please enter only your own income.</i> |                                         |
| <input type="checkbox"/> Under 900€                                                                                                                                                                    | <input type="checkbox"/> 2,600-3,599€   |
| <input type="checkbox"/> 900-1,299€                                                                                                                                                                    | <input type="checkbox"/> 3,600-4,999€   |
| <input type="checkbox"/> 1,300-1,499€                                                                                                                                                                  | <input type="checkbox"/> 5,000€ or more |
| <input type="checkbox"/> 1,500- 1,999€                                                                                                                                                                 | <input type="checkbox"/> No answer      |
| <input type="checkbox"/> 2,000-2,599€                                                                                                                                                                  |                                         |
